# Supplementary material for: COVID-19 and E-Commerce Operations: Evidence from Alibaba
Source: Atypon-hosted journal article supplement (doi:10.1287/msom.2021.1075), 2022-01-27
Supplement: msom.2021.1075.sm1.pdf [file msom.2021.1075.sm1.pdf]

# Online Supplement. Additional Tables and Figures for Paper "COVID-19 and E-commerce Operations: Evidence from Alibaba"

## A. Summary Statistics from Section 3

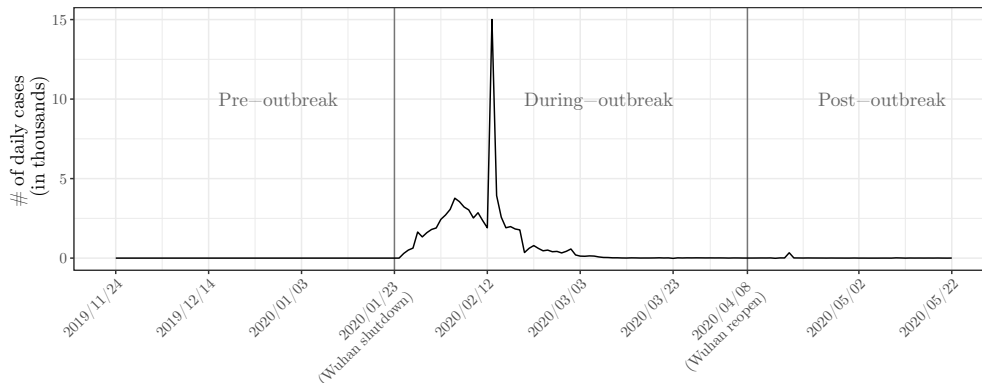

**Figure 1 Daily Confirmed COVID-19 Cases in China**

*Notes:* There is a spike of daily cases on February 13. It is mainly due to the change of reporting method, which adds clinically diagnosed cases to the existing laboratory-confirmed cases.

Mainland China consists of 4 direct-administered municipalities (Shanghai, Beijing, Chongqing, and Tianjin), 293 prefecture-level cities (e.g., Hangzhou, Wuhan), and 388 county-level cities. Prefecture-level cities govern county-level cities, mostly rural areas with a smaller population. Our panel data includes 4 municipalities, 283 prefecture-level cities, and 52 county-level cities. There are only 10 prefecture-level cities (Danzhou, Bijie, Tongren, Shigatse, Changdu, Linzhi, Shannan, Haidong, Turpan, and Hami) missing in our data. According to National Bureau of Statistics of China (2019), the covered cities in our panel data comprises 92.5% of the total population in China in 2019.

In Table 1, we summarize a list of variables we have collected from Alibaba, Cainiao, and China CDC. Note that some of the (time series) variables are collected only at the national level due to restricted data access at the Alibaba group. For the same reason, we provide summary statistics in Table 2 for our key outcome variables with anonymized scales.

## B. Robustness Checks from Section 4.2

We change the threshold of 10 cases to 5 and 20 cases and rerun our model (Equation (3) from Section 4.2) in Table 4. As we can see, the estimates are consistent across Columns (1)–(3).

In Figure 2, we breakdown  $DuringWuhanShutdown_t$  and  $AfterWuhanReopen_t$  from Equation (3) into a set of week-specific dummy variables and estimate the impact of COVID-19 intensity by week relative to Wuhan shutdown. As we can see, the weekly effect becomes insignificant two weeks after Wuhan reopens.

**Table 1 List of Variables**

| Variable                         | Description                                            | Unit of Obs. | Period                                                                      | Source          |
|----------------------------------|--------------------------------------------------------|--------------|-----------------------------------------------------------------------------|-----------------|
| <b>Sales related</b>             |                                                        |              |                                                                             |                 |
| <i>Sales</i>                     | Total sales of Alibaba's e-commerce platforms          | City-day     | 2019/11/24 – 2020/05/27 & 2018/12/05 – 2019/06/08 & 2017/12/16 – 2018/06/19 | Alibaba         |
| <b>Logistics related</b>         |                                                        |              |                                                                             |                 |
| <i>TotalOrder</i>                | Total number of logistics orders                       | City-day     | 2019/11/24 – 2020/05/27 & 2018/12/05 – 2019/06/08                           | Alibaba-Cainiao |
| <i>AvgDeliveryTime</i>           | Average package delivery time                          | City-day     | 2019/11/24 – 2020/05/27 & 2018/12/05 – 2019/06/08                           | Alibaba-Cainiao |
| <b>Customer ordering process</b> |                                                        |              |                                                                             |                 |
| <i>Cart Add-on/Item-view</i>     | Number of cart add-ons divided by number of item-views | Day          | 2019/11/24 – 2020/04/12 & 2018/12/05 – 2019/04/24                           | Alibaba         |
| <i>Order/Cart Add-on</i>         | Number of orders divided by number of cart add-ons     | Day          | 2019/11/24 – 2020/04/12 & 2018/12/05 – 2019/04/24                           | Alibaba         |
| <b>COVID-19 case data</b>        |                                                        |              |                                                                             |                 |
| <i>DailyCases</i>                | Number of confirmed COVID-19 cases                     | City-day     | 2019/01/20 – 2020/05/27                                                     | China CDC       |

**Table 2 Summary Statistics of Key Variables for the 2019 and 2020 Periods (City-day Panel Data Normalized to Mean 0 Standard Deviation 1 for Anonymity)**

|                      |                                           | Before Wuhan shutdown   | During Wuhan shutdown   | After Wuhan reopen      |
|----------------------|-------------------------------------------|-------------------------|-------------------------|-------------------------|
| <i>2020 data</i>     | Calendar date                             | 2019/11/24 – 2020/01/22 | 2020/01/23 – 2020/04/07 | 2020/04/08 – 2020/05/27 |
| ( <i>N</i> = 63,054) | Number of days                            | 60                      | 76                      | 50                      |
|                      | <i>Sales</i> mean (std.)                  | 0.137 (1.510)           | -0.046 (0.787)          | 0.120 (0.991)           |
|                      | <i>TotalOrder</i> mean (std.)             | 0.100 (1.150)           | -0.126 (0.852)          | 0.182 (1.150)           |
|                      | <i>AvgDeliveryTime</i> mean (std.)        | -0.154 (0.787)          | 0.681 (1.360)           | -0.278 (0.718)          |
| <i>2019 data</i>     | Calendar date                             | 2018/12/05 – 2019/02/02 | 2019/02/03 – 2019/04/19 | 2019/04/20 – 2019/06/08 |
| ( <i>N</i> = 63,054) | Number of days                            | 60                      | 76                      | 50                      |
|                      | <i>Sales</i> mean (std.)                  | -0.053 (1.030)          | -0.090 (0.704)          | -0.014 (0.847)          |
|                      | <i>TotalOrder</i> mean (std.)             | -0.035 (0.959)          | -0.074 (0.903)          | 0.044 (1.000)           |
|                      | <i>AvgDeliveryTime</i> mean (std.)        | -0.123 (0.782)          | -0.079 (0.899)          | -0.305 (0.700)          |
| <i>2020 – 2019</i>   | Mean difference in <i>Sales</i>           | 0.190***                | 0.046***                | 0.134***                |
|                      | Mean difference in <i>TotalOrder</i>      | 0.135***                | -0.052***               | 0.138***                |
|                      | Mean difference in <i>AvgDeliveryTime</i> | -0.031***               | 0.760***                | 0.027***                |

\* $p < 0.05$ ; \*\* $p < 0.01$ ; \*\*\* $p < 0.001$ 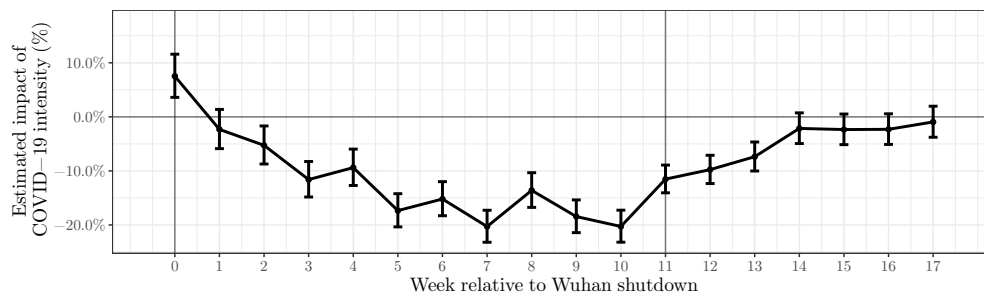**Figure 2 Impact of COVID-19 Intensity on E-commerce Sales by Week**

### C. Matching Estimators from Section 4.2

This section seeks to obtain a cleaner causal estimate for the impact of COVID-19 intensity on e-commerce sales. We collect additional data on city-level characteristics (by year-end of 2019) from the National Bureau of Statistics of China. The city-level characteristics include administrative land area, GDP per capita, average

**Table 3** Timing of Containment Policies Across Cities

| City                             | Province     | Start date | End date   | Cases <sup>1</sup> | City                       | Province       | Start date | End date   | Cases |
|----------------------------------|--------------|------------|------------|--------------------|----------------------------|----------------|------------|------------|-------|
| <b>Panel A. Shutdown</b>         |              |            |            |                    | <b>Panel C. Checkpoint</b> |                |            |            |       |
| Wuhan                            | Hubei        | 2020/01/23 | 2020/04/08 | 49,122             | Shijiazhuang               | Hebei          | 2020/02/05 | 2020/03/24 | 29    |
| Huanggang                        | Hubei        | 2020/01/23 | 2020/03/25 | 2,905              | Sanya                      | Hainan         | 2020/02/05 | 2020/02/23 | 54    |
| Ezhou                            | Hubei        | 2020/01/23 | 2020/03/25 | 1,391              | Yangzhou                   | Jiangsu        | 2020/02/05 | 2020/02/23 | 23    |
| Jingmen                          | Hubei        | 2020/01/24 | 2020/03/25 | 925                | Jinan                      | Shandong       | 2020/02/05 | 2020/02/21 | 47    |
| Xiantao                          | Hubei        | 2020/01/24 | 2020/03/25 | 0                  | Maanshan                   | Anhui          | 2020/02/06 | 2020/02/23 | 38    |
| Qianjiang                        | Hubei        | 2020/01/24 | 2020/03/25 | 0                  | Suzhou                     | Jiangsu        | 2020/02/06 | 2020/02/23 | 87    |
| Enshi                            | Hubei        | 2020/01/24 | 2020/03/25 | 4                  | Zhuhai                     | Sichuan        | 2020/02/06 | 2020/02/24 | 98    |
| Shiyan                           | Hubei        | 2020/01/24 | 2020/03/25 | 672                | Yaan                       | Sichuan        | 2020/02/06 | 2020/02/24 | 7     |
| Xianning                         | Hubei        | 2020/01/24 | 2020/03/25 | 836                | Shenzhen                   | Guangdong      | 2020/02/07 | 2020/02/22 | 417   |
| Suizhou                          | Hubei        | 2020/01/24 | 2020/03/25 | 1,307              | Hefei                      | Anhui          | 2020/02/07 | 2020/02/23 | 174   |
| Yichang                          | Hubei        | 2020/01/24 | 2020/03/25 | 931                | Lanzhou                    | Gansu          | 2020/02/07 | 2020/02/14 | 35    |
| Huangshi                         | Hubei        | 2020/01/24 | 2020/03/25 | 1,014              | Tangshan                   | Hebei          | 2020/02/07 | 2020/03/24 | 58    |
| Xiaogan                          | Hubei        | 2020/01/24 | 2020/03/25 | 3,518              | Guangyuan                  | Sichuan        | 2020/02/07 | 2020/02/24 | 6     |
| Enshitujiazumiaozu               | Hubei        | 2020/01/24 | 2020/03/25 | 252                | Chengdu                    | Sichuan        | 2020/02/07 | 2020/02/24 | 143   |
| Jingzhou                         | Hubei        | 2020/01/24 | 2020/03/25 | 1,579              | Guiyang                    | Guizhou        | 2020/02/07 | 2020/02/15 | 36    |
| Tianmen                          | Hubei        | 2020/01/24 | 2020/03/25 | 0                  | Lianyungang                | Jiangsu        | 2020/02/07 | 2020/02/23 | 48    |
| Xiangyang                        | Hubei        | 2020/01/28 | 2020/03/25 | 0                  | Tianjin                    | Tianjin        | 2020/02/07 | 2020/03/15 | 136   |
| <b>Panel B. Partial shutdown</b> |              |            |            |                    | <b>Panel C. Checkpoint</b> |                |            |            |       |
| Wenzhou                          | Zhejiang     | 2020/02/02 | 2020/02/19 | 504                | Guangzhou                  | Guangdong      | 2020/02/07 | 2020/02/22 | 346   |
| Zhengzhou                        | Henan        | 2020/02/04 | 2020/02/25 | 157                | Suining                    | Sichuan        | 2020/02/07 | 2020/02/24 | 17    |
| Hangzhou                         | Zhejiang     | 2020/02/04 | 2020/02/19 | 169                | Ziyan                      | Sichuan        | 2020/02/08 | 2020/02/24 | 4     |
| Zhumadian                        | Henan        | 2020/02/04 | 2020/02/25 | 139                | Foshan                     | Guangdong      | 2020/02/08 | 2020/02/22 | 84    |
| Ningbo                           | Zhejiang     | 2020/02/04 | 2020/02/19 | 157                | Huizhou                    | Guangdong      | 2020/02/09 | 2020/02/22 | 62    |
| Haerbin                          | Heilongjiang | 2020/02/04 | 2020/02/24 | 198                | Mianyang                   | Sichuan        | 2020/02/09 | 2020/02/24 | 22    |
| Fuzhou                           | Fujian       | 2020/02/04 | 2020/02/23 | 72                 | Deyang                     | Sichuan        | 2020/02/09 | 2020/02/24 | 18    |
| <b>Panel C. Checkpoint</b>       |              |            |            |                    | <b>Panel C. Checkpoint</b> |                |            |            |       |
| Huaian                           | Jiangsu      | 2020/02/03 | 2020/02/23 | 0                  | Wuxi                       | Jiangsu        | 2020/02/09 | 2020/02/23 | 55    |
| Nantong                          | Jiangsu      | 2020/02/04 | 2020/02/23 | 40                 | Shanghai                   | Shanghai       | 2020/02/10 | 2020/03/22 | 337   |
| Xuzhou                           | Jiangsu      | 2020/02/04 | 2020/02/23 | 79                 | Beijing                    | Beijing        | 2020/02/10 | 2020/03/25 | 413   |
| Nanjing                          | Jiangsu      | 2020/02/04 | 2020/02/23 | 93                 | Eerdouosi                  | Inner Mongolia | 2020/02/12 | 2020/02/24 | 0     |
| Zhenjiang                        | Jiangsu      | 2020/02/04 | 2020/02/23 | 12                 | Wulanchabu                 | Inner Mongolia | 2020/02/12 | 2020/02/24 | 3     |
| Linyi                            | Shandong     | 2020/02/04 | 2020/02/21 | 49                 | Tongliao                   | Inner Mongolia | 2020/02/12 | 2020/02/24 | 7     |
| Jingdezhen                       | Jiangxi      | 2020/02/04 | 2020/02/13 | 6                  | Bayannaer                  | Inner Mongolia | 2020/02/12 | 2020/02/24 | 8     |
| Haikou                           | Hainan       | 2020/02/05 | 2020/02/23 | 39                 | Alashan                    | Inner Mongolia | 2020/02/12 | 2020/02/24 | 0     |
| Nanchang                         | Jiangxi      | 2020/02/05 | 2020/02/13 | 230                | Wuhai                      | Inner Mongolia | 2020/02/12 | 2020/02/24 | 2     |
| Nanning                          | Guangxi      | 2020/02/05 | 2020/02/24 | 55                 | Hulunbeier                 | Inner Mongolia | 2020/02/12 | 2020/02/24 | 6     |
| Suqian                           | Jiangsu      | 2020/02/05 | 2020/02/23 | 13                 | Xingan                     | Inner Mongolia | 2020/02/12 | 2020/02/24 | 1     |
| Qingdao                          | Shandong     | 2020/02/05 | 2020/02/21 | 60                 | Chifeng                    | Inner Mongolia | 2020/02/12 | 2020/02/24 | 8     |
| Kunming                          | Yunnan       | 2020/02/05 | 2020/02/13 | 53                 | Baotou                     | Inner Mongolia | 2020/02/12 | 2020/02/24 | 11    |
| Taian                            | Shandong     | 2020/02/05 | 2020/02/21 | 35                 | Xilinguole                 | Inner Mongolia | 2020/02/12 | 2020/02/24 | 9     |
| Taizhou                          | Jiangsu      | 2020/02/05 | 2020/02/23 | 37                 | Huhehaote                  | Inner Mongolia | 2020/02/12 | 2020/02/24 | 7     |

Notes: This is a duplicate table from Table A1 in Fang et al. (2020). We collected additional data for the end date of containment policies.<sup>1</sup> "Cases" refers to the total number of confirmed cases by the time of start date in each city.

income, total population, population density per km<sup>2</sup>, number of employed, total retail sales, and number of hospitals. Among the 339 cities investigated in this study, 145 (40%) cities have less than 10 confirmed cases during the COVID-19 outbreak. We consider these cities as the control benchmark. The other 194 cities with high COVID-19 intensity are the treatment group. We then use matching to construct a subsample that achieves a better balance. We use propensity score matching (PSM) to improve the balance regarding propensity scores. The second coarsened exact matching (CEM) improves the covariate balance in particular.

### C.1. Propensity Score Matching (PSM)

For the PSM, we estimate a logistic regression based on the city-level characteristics and obtain the predicted probability (i.e., propensity score) of each city having more than 10 cases. We find a one-to-one match in the control group with the closest value of propensity score (caliper is set at 0.2 standard deviations). The matched sample has 107 cities in the treatment group and control group, respectively. (The matching rate is 63%.) To assess the balance across two groups, we plot the distributions of propensity scores by group in Figure 3. It shows that the two distributions significantly overlap with each other.

**Table 4** Impact of COVID-19 Intensity on E-commerce Sales (with Different Thresholds)

|                                                     | Log( <i>Sales</i> )  |                      |                      |
|-----------------------------------------------------|----------------------|----------------------|----------------------|
|                                                     | (1)                  | (2)                  | (3)                  |
| <i>TotalCases</i> > 10 · <i>DuringWuhanShutdown</i> | -0.126***<br>(0.003) |                      |                      |
| <i>TotalCases</i> > 10 · <i>AfterWuhanReopen</i>    | -0.060***<br>(0.004) |                      |                      |
| <i>TotalCases</i> > 5 · <i>DuringWuhanShutdown</i>  |                      | -0.115***<br>(0.003) |                      |
| <i>TotalCases</i> > 5 · <i>AfterWuhanReopen</i>     |                      | -0.069***<br>(0.004) |                      |
| <i>TotalCases</i> > 20 · <i>DuringWuhanShutdown</i> |                      |                      | -0.138***<br>(0.003) |
| <i>TotalCases</i> > 20 · <i>AfterWuhanReopen</i>    |                      |                      | -0.052***<br>(0.004) |
| Date FE                                             | Yes                  | Yes                  | Yes                  |
| City FE                                             | Yes                  | Yes                  | Yes                  |
| Observations                                        | 63,054               | 63,054               | 63,054               |
| $R^2$                                               | 0.986                | 0.986                | 0.986                |

Robust standard errors clustered by city in parentheses

\* $p < 0.05$ ; \*\* $p < 0.01$ ; \*\*\* $p < 0.001$ 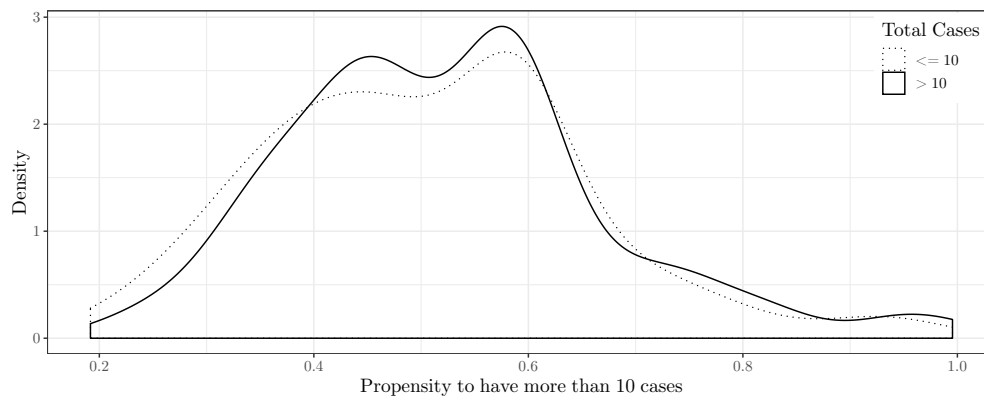**Figure 3** Distribution of Propensity Score After Matching

## C.2. Coarsened Exact Matching (CEM)

We also conduct a CEM on the city-level covariates, which effectively improves the covariate balance. We summarize each covariate before and after matching in Table 5. After matching, we find no significant mean difference across the two groups.

**Table 5 Covariate Balance Before and After CEM**

|                                                    | Before Matching |            |            | After Matching |           |            |
|----------------------------------------------------|-----------------|------------|------------|----------------|-----------|------------|
|                                                    | Total Cases     |            |            | Total Cases    |           |            |
|                                                    | $\leq 10$       | $> 10$     | $p$ -Value | $\leq 10$      | $> 10$    | $p$ -Value |
| Administrative land area (sq. km)                  | 20,860          | 13,713     | 0.00       | 15,053         | 13,953    | 0.33       |
| GDP per capita (RMB)                               | 57,265          | 66,692     | 0.01       | 52,195         | 53,239    | 0.70       |
| Average wages of employees (RMB)                   | 72,461          | 74,197     | 0.67       | 69,256         | 68,810    | 0.67       |
| Total population (10,000 persons)                  | 371             | 530        | 0.00       | 351            | 350       | 0.95       |
| Population density (persons per km <sup>2</sup> )  | 326             | 529        | 0.00       | 328            | 350       | 0.46       |
| Employed persons in units (10,000 persons)         | 48.79           | 70.31      | 0.02       | 38.90          | 35.31     | 0.29       |
| Total retail sales of consumer goods (10,000 yuan) | 10,071,163      | 15,614,983 | 0.00       | 8,410,182      | 7,758,285 | 0.40       |
| Number of hospitals and health centers (unit)      | 81.90           | 80.24      | 0.00       | 87.06          | 78.53     | 0.20       |
| Observations                                       | 145             | 194        |            | 103            | 49        |            |

## D. Robustness Check from Section 4.3

The fixed-effect DID model (Equation (4)) in Section 4.3 leverages containment policy changes for identification. We can examine the robustness of our estimates by examining whether the effect appears before the implementation. In Table 6 Column (2), we added a set of dummy variables, which equals 1 only during the one month before the start date of each containment measure. None of the coefficients are statistically significant. It suggests that the containment effect does not appear spuriously before it happens. As such, it serves as a falsification test, which further strengthens the validity of our estimates.

## E. Heterogeneous Impact of COVID-19 Across Buyers and Sellers: Suggestive Evidence on “Digital Expansion”

This section provides some suggestive evidence on how the demand and supply side of e-commerce reacts to the pandemic. We collect additional subsampled data for the 2019 and 2020 data and estimate the overall impact of COVID-19 on e-commerce sales for particular buyer/seller segments.

First, we partition all consumers based on their total number of orders in 2019 and estimate Equation (1) in Columns (1) and (2) of Table 7 for each subgroup. We find that the sales for both customers at the top 25% and the bottom 75% percentile decrease significantly during the outbreak. After Wuhan shutdown, the

**Table 6** Impact of Containment Policies on E-commerce Sales: Robustness Check

|                                     | Log( <i>Sales</i> )  |                      |
|-------------------------------------|----------------------|----------------------|
|                                     | Main                 | Falsification test   |
|                                     | (1)                  | (2)                  |
| <i>Checkpoint_Before1Month</i>      |                      | 0.016<br>(0.015)     |
| <i>PartialShutdown_Before1Month</i> |                      | 0.027<br>(0.014)     |
| <i>Shutdown_Before1Month</i>        |                      | 0.021<br>(0.011)     |
| <i>Checkpoint</i>                   | -0.050***<br>(0.004) | -0.044***<br>(0.004) |
| <i>PartialShutdown</i>              | -0.113***<br>(0.010) | -0.102***<br>(0.012) |
| <i>Shutdown</i>                     | -0.811***<br>(0.008) | -0.801***<br>(0.009) |
| <i>AfterCheckpoint</i>              | -0.053***<br>(0.004) | -0.048***<br>(0.005) |
| <i>AfterPartialShutdown</i>         | -0.011<br>(0.011)    | -0.001<br>(0.012)    |
| <i>AfterShutdown</i>                | -0.064***<br>(0.008) | -0.055***<br>(0.010) |
| Day of week FE                      | Yes                  | Yes                  |
| Lunar date FE                       | Yes                  | Yes                  |
| Observations                        | 63,054               | 63,054               |
| $R^2$                               | 0.988                | 0.988                |

Robust standard errors clustered by city in parentheses

\* $p < 0.05$ ; \*\* $p < 0.01$ ; \*\*\* $p < 0.001$ 

bottom 75% of customers significantly increase their sales on the platform by 11% ( $p < 0.001$ ), while the impact on the top 25% of customers remains negative. (Note that the bottom 75% of customers also include a small proportion of new customers, around 0.9% who have never shopped on Alibaba.) The results on the top 25% of frequent buyers echo the anecdotal evidence from the USA (Badger and Parlapiano 2020), showing that the rich have significantly cut their spending since the outbreak. Moreover, to distinguish individual and corporate sellers, we quantify the impact of COVID-19 on the sellers for the C-to-C (taobao.com) and B-to-C (tmall.com) platforms, respectively. We partition all individual sellers on the C-to-C platform based on their annual sales in 2019 and carry out a similar subgroup analysis in Columns (3) and (4). We find that on the C-to-C platform, only large sellers are negatively affected by COVID-19, while small- and medium-sized sellers have gained significantly from the pandemic. Specifically, we estimate 35% ( $p < 0.001$ ) and 24% ( $p < 0.001$ ) decrease in sales for the top 25% of sellers during Wuhan shutdown and after Wuhan reopen, respectively. In contrast, there is a significant increase in sales (by 50% and 26%, respectively) for the bottom 75% of sellers. We further present the results for corporate sellers on the B-to-C platform in Columns (5) and (6). It shows that large corporate sellers at the top 25% percentile take a larger hit during COVID-19

than the bottom 75%. After Wuhan reopen, there is a sharp increase for small and medium sellers, while the negative impact on the large sellers persists. For example, we estimate an 18% ( $p < 0.001$ ) increase in sales for the small- to medium-sized corporate seller but a 9% ( $p < 0.001$ ) decreases for large sellers.

**Table 7 Heterogeneous Impact of COVID-19 on E-commerce Sales Across Buyers and Sellers**

|                                       | Log( <i>Sales</i> )                 |                      |                                         |                      |                                       |                      |
|---------------------------------------|-------------------------------------|----------------------|-----------------------------------------|----------------------|---------------------------------------|----------------------|
|                                       | By customer order frequency in 2019 |                      | By seller annual sales in 2019 (C-to-C) |                      | By firm annual sales in 2019 (B-to-C) |                      |
|                                       | Bottom 75% (1)                      | Top 25% (2)          | Bottom 75% (3)                          | Top 25% (4)          | Bottom 75% (5)                        | Top 25% (6)          |
| <i>Year2020</i>                       | 0.404***<br>(0.013)                 | 0.415***<br>(0.015)  | 1.383***<br>(0.016)                     | 0.541***<br>(0.014)  | 0.665***<br>(0.014)                   | 0.231***<br>(0.014)  |
| <i>Year2020 · DuringWuhanShutdown</i> | -0.145***<br>(0.017)                | -0.341***<br>(0.020) | 0.399***<br>(0.021)                     | -0.430***<br>(0.019) | -0.051**<br>(0.019)                   | -0.188***<br>(0.019) |
| <i>Year2020 · DuringWuhanShutdown</i> | 0.102***<br>(0.019)                 | -0.251***<br>(0.022) | 0.233***<br>(0.024)                     | -0.272***<br>(0.021) | 0.166***<br>(0.021)                   | -0.090***<br>(0.021) |
| Day of week                           | Yes                                 | Yes                  | Yes                                     | Yes                  | Yes                                   | Yes                  |
| FE                                    |                                     |                      |                                         |                      |                                       |                      |
| Lunar date FE                         | Yes                                 | Yes                  | Yes                                     | Yes                  | Yes                                   | Yes                  |
| Observations                          | 126,108                             | 126,108              | 126,108                                 | 126,108              | 126,108                               | 126,108              |
| $R^2$                                 | 0.104                               | 0.074                | 0.245                                   | 0.095                | 0.140                                 | 0.075                |

Robust standard errors clustered by city in parentheses  
\*  $p < 0.05$ ; \*\*  $p < 0.01$ ; \*\*\*  $p < 0.001$

## References

Badger E, Parlapiano A (2020) The rich cut their spending. That has hurt all the workers who count on it.

URL <https://www.nytimes.com/2020/06/17/upshot/coronavirus-spending-rich-poor.html>.

Fang H, Wang L, Yang Y (2020) Human mobility restrictions and the spread of the novel coronavirus (2019-ncov) in China. *Journal of Public Economics* 191:104272.

National Bureau of Statistics of China (2019) Statistical yearbook of China. URL <http://www.stats.gov.cn/tjsj/nds/2019/indexeh.htm>.
